# Supplementary material for: Family cord blood banking for sickle cell disease: a twenty-year experience in two dedicated public cord blood banks
Source: PubMed Central journal article supplement — Haematologica. 2017 Jun;102(6):976–83. doi: 10.3324/haematol.2016.163055 (PMC5451329; doi:10.3324/haematol.2016.163055), 2017-06
Supplement: 2016_163055-Disclosures_and_Contributions.pdf [file 2016_163055-Disclosures_and_Contributions.pdf]

Haematologica  
HAEMATOL/2016/163055  
Version 3

Family cord blood banking for sickle cell disease: a twenty-year  
experience in two dedicated public cord blood banks

Hanadi Rafii, Françoise Bernaudin, Helene Rouard, Valérie Vanneaux,  
Annalisa Ruggeri, Marina Cavazzana, Valerie Gauthereau, Aurélie  
Stanislas, Malika Benkerrou, Mariane De Montalembert, Christele  
Ferry, Robert Girod, Cecile Arnaud, Annie Kamdem, Joelle Gour,  
Claudine Touboul, Audrey Cras, Mathieu Kuentz, Claire Rieux,  
Fernanda Volt, Barbara Cappelli, Karina T Maio, Annalisa Paviglianiti,  
Chantal Kenzey, Jerome Larghero, and Eliane Gluckman

Disclosures: The authors have no conflict of interest to disclose.

Contributions: EG, JL, FB and HRo designed the study; VV and AC prepared the cell therapy data for analysis; JL and HRo received all UCB and validated the cell therapy data. JG, CT, VG and AS provided neonatal screening data. FB, CA, AK, CT, MC, MB, CF, MDM, RG did clinical follow-up of patients and provided data for the study. HR, VG, CK, AS and JG collected and verified data; BC, KTM and AP helped with data management; HR and AR performed statistical analysis; HR, FV and EG wrote the manuscript. FB, JL, HRo, AR, MC, MDM, CR, RG, MK, BC, KTM, CK and AP edited the manuscript. All authors read and approved the manuscript.
